# Supplementary material for: Inflammasome-Related Genetic Polymorphisms as Severity Biomarkers of COVID-19
Source: MDPI journal article supplement (doi:10.3390/ijms25073731), 2024-03-27
Supplement: s1 [file s1]

*Additional Files*

## **Inflammasome-related genetic polymorphisms as severity biomarkers of COVID-19?**

Verónica Pulito-Cueto<sup>1,2\*‡</sup>, María Sebastián Mora-Gil<sup>1,2\*</sup>, Diego Ferrer<sup>3</sup>, Sara Remuzgo-Martínez<sup>4</sup>, Fernanda Genre<sup>4</sup>, Leticia Lera-Gómez<sup>5</sup>, Pilar Alonso-Lecue<sup>1,3</sup>, Joao Carlos Batista-Liz<sup>1,2</sup>, Sandra Tello-Mena<sup>3</sup>, Beatriz Abascal-Bolado<sup>3</sup>, Sheila Izquierdo<sup>3</sup>, Juan José Ruiz-Cubillan<sup>3</sup>, Carlos Armiñanzas-Castillo<sup>6</sup>, Ricardo Blanco<sup>1,2</sup>, Miguel A. González-Gay<sup>7,8</sup>, Raquel López-Mejías<sup>1,2\*\*</sup>, and José M. Cifrián<sup>1,3,7\*\*</sup>

**Table S1.** Differences in *NLRP3* genotype and allele distribution between COVID-19 mild patients and moderate patients, severe patients as well as critical patients.

|       |            | COVID-19 Patients       |                 |                       |                 |                         |                 |                           |                 |                             |                 |                           |                 |
|-------|------------|-------------------------|-----------------|-----------------------|-----------------|-------------------------|-----------------|---------------------------|-----------------|-----------------------------|-----------------|---------------------------|-----------------|
| Locus | SNP        | Mild <i>vs</i> moderate |                 | Mild <i>vs</i> Severe |                 | Mild <i>vs</i> Critical |                 | Moderate <i>vs</i> Severe |                 | Moderate <i>vs</i> Critical |                 | Severe <i>vs</i> Critical |                 |
|       |            | <i>p</i>                | OR [95% CI]     | <i>p</i>              | OR [95% CI]     | <i>p</i>                | OR [95% CI]     | <i>p</i>                  | OR [95% CI]     | <i>p</i>                    | OR [95% CI]     | <i>p</i>                  | OR [95% CI]     |
| NLRP3 | rs4925659  |                         |                 |                       |                 |                         |                 |                           |                 |                             |                 |                           |                 |
|       | GG         | -                       | Ref.            | -                     | Ref.            | -                       | Ref.            | -                         | Ref.            | -                           | Ref.            | -                         | Ref.            |
|       | GA         | 0.02*                   | 2.54[1.14-5.66] | 0.15                  | 1.87[0.80-4.37] | 0.03*                   | 2.55[1.11-5.85] | 0.47                      | 0.77[0.39-1.55] | 0.88                        | 0.95[0.49-1.84] | 0.72                      | 1.11[0.61-2.04] |
|       | AA         | 0.22                    | 1.90[0.68-5.30] | 0.06                  | 2.87[0.97-8.53] | 0.05                    | 2.85[0.99-8.18] | 0.75                      | 0.86[0.34-2.18] | 0.81                        | 1.12[0.45-2.79] | 0.98                      | 0.99[0.44-2.23] |
|       | G          | -                       | Ref.            | -                     | Ref.            | -                       | Ref.            | -                         | Ref.            | -                           | Ref.            | -                         | Ref.            |
|       | A          | 0.09                    | 1.53[0.93-2.52] | 0.05                  | 1.69[1.00-2.86] | 0.03*                   | 1.75[1.06-2.89] | 0.61                      | 0.89[0.56-1.40] | 0.89                        | 1.03[0.66-1.62] | 0.92                      | 1.02[0.69-1.52] |
|       | rs10159239 |                         |                 |                       |                 |                         |                 |                           |                 |                             |                 |                           |                 |
|       | AA         | -                       | Ref.            | -                     | Ref.            | -                       | Ref.            | -                         | Ref.            | -                           | Ref.            | -                         | Ref.            |
|       | AG         | 0.34                    | 1.48[0.66-3.31] | 0.14                  | 0.52[0.22-1.23] | 0.044                   | 0.42[0.18-0.98] | 0.06                      | 0.48[0.22-1.04] | 0.01*                       | 0.36[0.17-0.79] | 0.98                      | 0.99[0.49-2.00] |
|       | GG         | 0.05                    | 0.36[0.13-0.98] | 0.02*                 | 0.26[0.08-0.82] | 0.017                   | 0.25[0.08-0.78] | 0.60                      | 1.27[0.52-3.10] | 0.67                        | 0.83[0.35-1.95] | 1.00                      | 1.00[0.44-2.30] |
|       | A          | -                       | Ref.            | -                     | Ref.            | -                       | Ref.            | -                         | Ref.            | -                           | Ref.            | -                         | Ref.            |
|       | G          | 0.08                    | 0.64[0.39-1.05] | 0.02*                 | 0.54[0.32-0.92] | 0.016                   | 0.54[0.33-0.89] | 0.67                      | 1.10[0.70-1.72] | 0.74                        | 0.93[0.60-1.43] | 1.00                      | 1.00[0.66-1.48] |
|       | rs10754558 |                         |                 |                       |                 |                         |                 |                           |                 |                             |                 |                           |                 |
|       | CC         | -                       | Ref.            | -                     | Ref.            | -                       | Ref.            | -                         | Ref.            | -                           | Ref.            | -                         | Ref.            |
|       | CG         | 0.74                    | 0.87[0.39-1.96] | <0.01*                | 0.26[0.11-0.62] | <0.01*                  | 0.32[0.14-0.71] | 0.03*                     | 0.42[0.19-0.91] | 0.03*                       | 0.44[0.21-0.94] | 0.74                      | 1.12[0.58-2.17] |
|       | GG         | 0.01*                   | 0.26[0.09-0.72] | 0.02*                 | 0.23[0.07-0.78] | 0.03*                   | 0.29[0.09-0.90] | 0.24                      | 1.73[0.69-4.34] | 0.50                        | 1.34[0.57-3.13] | 0.79                      | 1.12[0.49-2.60] |
|       | C          | -                       | Ref.            | -                     | Ref.            | -                       | Ref.            | -                         | Ref.            | -                           | Ref.            | -                         | Ref.            |
|       | G          | <0.01*                  | 0.50[0.30-0.83] | <0.01*                | 0.45[0.26-0.79] | <0.01*                  | 0.50[0.30-0.84] | 0.36                      | 1.23[0.79-1.93] | 0.58                        | 1.13[0.73-1.75] | 0.79                      | 1.06[0.72-1.55] |
|       | rs4353135  |                         |                 |                       |                 |                         |                 |                           |                 |                             |                 |                           |                 |
|       | TT         | -                       | Ref.            | -                     | Ref.            | -                       | Ref.            | -                         | Ref.            | -                           | Ref.            | -                         | Ref.            |
|       | TG         | 0.04*                   | 0.43[0.20-0.96] | 0.03*                 | 0.39[0.17-0.89] | 0.24                    | 0.62[0.28-1.37] | 0.66                      | 0.85[0.41-1.77] | 0.14                        | 1.70[0.85-3.41] | 0.12                      | 1.66[0.88-3.14] |
|       | GG         | 0.36                    | 0.60[0.20-1.78] | 0.41                  | 0.62[0.20-1.94] | 0.23                    | 0.53[0.19-1.49] | 0.82                      | 0.89[0.31-2.53] | 0.62                        | 0.79[0.31-2.02] | 0.78                      | 0.89[0.39-2.03] |
|       | T          | -                       | Ref.            | -                     | Ref.            | -                       | Ref.            | -                         | Ref.            | -                           | Ref.            | -                         | Ref.            |
|       | G          | 0.16                    | 0.69[0.42-1.15] | 0.16                  | 0.68[0.40-1.16] | 0.15                    | 0.68[0.41-1.14] | 0.77                      | 0.94[0.60-1.47] | 0.99                        | 1.00[0.64-1.55] | 0.89                      | 1.03[0.69-1.53] |

COVID-19: coronavirus 19 disease. \*The statistical significance was lost after correcting for multiple testing using the Benjamini-Hochberg method for a False Discovery Rate (FDR) of 5%.

**Table S2.** Differences in *NLRC4* genotype and allele distribution between COVID-19 mild patients and moderate patients, severe patients as well as critical patients.

|       |          | COVID-19 Patients       |                 |                       |                 |                         |                 |                           |                 |                             |                 |                           |                 |
|-------|----------|-------------------------|-----------------|-----------------------|-----------------|-------------------------|-----------------|---------------------------|-----------------|-----------------------------|-----------------|---------------------------|-----------------|
| Locus | SNP      | Mild <i>vs</i> moderate |                 | Mild <i>vs</i> Severe |                 | Mild <i>vs</i> Critical |                 | Moderate <i>vs</i> Severe |                 | Moderate <i>vs</i> Critical |                 | Severe <i>vs</i> Critical |                 |
|       |          | <i>p</i>                | OR [95% CI]     | <i>p</i>              | OR [95% CI]     | <i>p</i>                | OR [95% CI]     | <i>p</i>                  | OR [95% CI]     | <i>p</i>                    | OR [95% CI]     | <i>p</i>                  | OR [95% CI]     |
| NLRC4 | rs385076 |                         |                 |                       |                 |                         |                 |                           |                 |                             |                 |                           |                 |
|       | CC       | -                       | Ref.            | -                     | Ref.            | -                       | Ref.            | -                         | Ref.            | -                           | Ref.            | -                         | Ref.            |
|       | CT       | 0.84                    | 1.08[0.51-2.27] | 0.74                  | 0.88[0.40-1.92] | 0.97                    | 0.98[0.47-2.04] | 0.40                      | 0.74[0.37-1.48] | 0.93                        | 1.03[0.53-2.01] | 0.09                      | 1.68[0.93-3.04] |
|       | TT       | 0.18                    | 0.47[0.16-1.42] | 0.40                  | 0.60[0.18-1.98] | 0.90                    | 0.92[0.29-3.00] | 0.66                      | 1.23[0.49-3.12] | 0.19                        | 1.86[0.73-4.76] | 0.13                      | 2.01[0.81-5.01] |
|       | C        | -                       | Ref.            | -                     | Ref.            | -                       | Ref.            | -                         | Ref.            | -                           | Ref.            | -                         | Ref.            |
|       | T        | 0.31                    | 0.77[0.46-1.27] | 0.44                  | 0.81[0.48-1.38] | 0.90                    | 0.97[0.58-1.61] | 0.90                      | 1.03[0.66-1.61] | 0.27                        | 1.29[0.82-2.01] | 0.07                      | 1.45[0.97-2.17] |
|       | rs479333 |                         |                 |                       |                 |                         |                 |                           |                 |                             |                 |                           |                 |
|       | GG       | -                       | Ref.            | -                     | Ref.            | -                       | Ref.            | -                         | Ref.            | -                           | Ref.            | -                         | Ref.            |
|       | GC       | 0.55                    | 1.27[0.59-2.73] | 0.86                  | 0.93[0.42-2.08] | 0.67                    | 1.18[0.56-2.49] | 0.27                      | 0.66[0.32-1.37] | 0.88                        | 0.95[0.47-1.90] | 0.08                      | 1.73[0.94-3.19] |
|       | CC       | 0.54                    | 0.72[0.26-2.01] | 0.91                  | 1.07[0.34-3.34] | 0.92                    | 1.06[0.36-3.09] | 0.44                      | 1.44[0.57-3.64] | 0.31                        | 1.55[0.66-3.67] | 0.34                      | 1.51[0.64-3.56] |
|       | G        | -                       | Ref.            | -                     | Ref.            | -                       | Ref.            | -                         | Ref.            | -                           | Ref.            | -                         | Ref.            |
|       | C        | 0.71                    | 0.81[0.55-1.50] | 0.98                  | 1.01[0.60-1.69] | 0.83                    | 1.06[0.64-1.74] | 0.66                      | 1.11[0.70-1.74] | 0.37                        | 1.22[0.79-1.90] | 0.18                      | 1.32[0.88-1.96] |

COVID-19: coronavirus 19 disease.

**Table S3.** Differences in *NLRP1* genotype and allele distribution between COVID-19 mild patients and moderate patients, severe patients as well as critical patients.

|       |           | COVID-19 Patients       |                 |                       |                 |                         |                 |                           |                 |                             |                 |                           |                 |
|-------|-----------|-------------------------|-----------------|-----------------------|-----------------|-------------------------|-----------------|---------------------------|-----------------|-----------------------------|-----------------|---------------------------|-----------------|
| Locus | SNP       | Mild <i>vs</i> moderate |                 | Mild <i>vs</i> Severe |                 | Mild <i>vs</i> Critical |                 | Moderate <i>vs</i> Severe |                 | Moderate <i>vs</i> Critical |                 | Severe <i>vs</i> Critical |                 |
|       |           | <i>p</i>                | OR [95% CI]     | <i>p</i>              | OR [95% CI]     | <i>p</i>                | OR [95% CI]     | <i>p</i>                  | OR [95% CI]     | <i>p</i>                    | OR [95% CI]     | <i>p</i>                  | OR [95% CI]     |
| NLRP1 | rs4790797 |                         |                 |                       |                 |                         |                 |                           |                 |                             |                 |                           |                 |
|       | GG        | -                       | Ref.            | -                     | Ref.            | -                       | Ref.            | -                         | Ref.            | -                           | Ref.            | -                         | Ref.            |
|       | GA        | 0.58                    | 0.79[0.34-1.84] | 0.63                  | 0.90[0.33-1.95] | 0.82                    | 1.10[0.47-2.59] | 0.55                      | 1.27[0.59-2.75] | 0.21                        | 1.63[0.76-3.52] | 0.53                      | 1.24[0.64-2.37] |
|       | AA        | 0.61                    | 1.30[0.48-3.54] | 0.29                  | 1.77[0.61-5.13] | 0.96                    | 1.02[0.40-2.62] | 0.47                      | 1.43[0.54-3.81] | 0.90                        | 1.06[0.44-2.57] | 0.30                      | 0.66[0.30-1.46] |
|       | G         | -                       | Ref.            | -                     | Ref.            | -                       | Ref.            | -                         | Ref.            | -                           | Ref.            | -                         | Ref.            |
|       | A         | 0.63                    | 1.13[0.69-1.83] | 0.35                  | 1.28[0.77-2.13] | 0.95                    | 1.02[0.62-1.65] | 0.49                      | 1.17[0.75-1.83] | 0.88                        | 1.03[0.67-1.59] | 0.37                      | 0.84[0.57-1.23] |
|       | rs8182352 |                         |                 |                       |                 |                         |                 |                           |                 |                             |                 |                           |                 |
|       | TT        | -                       | Ref.            | -                     | Ref.            | -                       | Ref.            | -                         | Ref.            | -                           | Ref.            | -                         | Ref.            |
|       | TC        | 0.46                    | 0.72[0.31-1.69] | 0.67                  | 0.82[0.34-2.00] | 0.99                    | 1.00[0.43-2.32] | 0.58                      | 1.24[0.58-2.67] | 0.29                        | 1.50[0.71-3.19] | 0.70                      | 1.14[0.59-2.17] |
|       | CC        | 0.67                    | 1.25[0.46-3.40] | 0.37                  | 1.61[0.57-4.60] | 0.84                    | 1.10[0.43-2.81] | 0.56                      | 1.33[0.51-3.49] | 0.85                        | 1.09[0.45-2.61] | 0.36                      | 0.69[0.32-1.53] |
|       | T         | -                       | Ref.            | -                     | Ref.            | -                       | Ref.            | -                         | Ref.            | -                           | Ref.            | -                         | Ref.            |
|       | C         | 0.70                    | 1.10[0.68-1.79] | 0.42                  | 1.24[0.74-2.06] | 0.82                    | 1.06[0.65-1.72] | 0.58                      | 1.14[0.73-1.77] | 0.81                        | 1.05[0.68-1.69] | 0.42                      | 0.85[0.58-1.26] |
|       | rs878329  |                         |                 |                       |                 |                         |                 |                           |                 |                             |                 |                           |                 |
|       | GG        | -                       | Ref.            | -                     | Ref.            | -                       | Ref.            | -                         | Ref.            | -                           | Ref.            | -                         | Ref.            |
|       | GC        | 0.53                    | 0.76[0.33-1.76] | 0.54                  | 0.75[0.30-1.88] | 0.89                    | 1.06[0.45-2.50] | 0.72                      | 1.15[0.53-2.49] | 0.24                        | 1.58[0.74-3.36] | 0.50                      | 1.25[0.65-2.41] |
|       | CC        | 0.50                    | 1.40[0.52-3.76] | 0.27                  | 1.83[0.62-5.35] | 0.93                    | 1.04[0.41-2.63] | 0.53                      | 1.37[0.51-3.68] | 0.99                        | 0.99[0.41-2.38] | 0.30                      | 0.66[0.30-1.46] |
|       | G         | -                       | Ref.            | -                     | Ref.            | -                       | Ref.            | -                         | Ref.            | -                           | Ref.            | -                         | Ref.            |
|       | C         | 0.53                    | 1.17[0.72-1.90] | 0.31                  | 1.31[0.78-2.21] | 0.92                    | 1.03[0.63-1.67] | 0.57                      | 1.14[0.73-1.78] | 0.98                        | 1.00[0.65-1.54] | 0.37                      | 0.84[0.57-1.23] |
|       | rs2670660 |                         |                 |                       |                 |                         |                 |                           |                 |                             |                 |                           |                 |
|       | AA        | -                       | Ref.            | -                     | Ref.            | -                       | Ref.            | -                         | Ref.            | -                           | Ref.            | -                         | Ref.            |
|       | AG        | 0.50                    | 0.75[0.33-1.72] | 0.72                  | 0.85[0.36-2.03] | 0.70                    | 0.85[0.37-1.94] | 0.49                      | 0.76[0.36-1.64] | 0.46                        | 0.76[0.36-1.59] | 0.96                      | 0.98[0.50-1.91] |
|       | GG        | 0.89                    | 1.07[0.40-2.91] | 0.74                  | 1.20[0.40-3.59] | 0.33                    | 0.61[0.23-1.63] | 0.85                      | 1.10[0.42-2.86] | 0.43                        | 0.70[0.29-1.68] | 0.29                      | 0.64[0.28-1.45] |
|       | A         | -                       | Ref.            | -                     | Ref.            | -                       | Ref.            | -                         | Ref.            | -                           | Ref.            | -                         | Ref.            |
|       | G         | 0.96                    | 1.01[0.62-1.65] | 0.81                  | 1.07[0.64-1.78] | 0.33                    | 0.79[0.48-1.28] | 0.94                      | 1.02[0.65-1.59] | 0.43                        | 0.84[0.55-1.29] | 0.32                      | 0.82[0.56-1.21] |

COVID-19: coronavirus 19 disease.

**Table S3 continuation.** Differences in *NLRP1* genotype and allele distribution between COVID-19 mild patients and moderate patients, severe patients as well as critical patients.

| Locus        | SNP               | COVID-19 Patients       |                 |                       |                  |                         |                 |                           |                  |                             |                 |                           |                 |
|--------------|-------------------|-------------------------|-----------------|-----------------------|------------------|-------------------------|-----------------|---------------------------|------------------|-----------------------------|-----------------|---------------------------|-----------------|
|              |                   | Mild <i>vs</i> moderate |                 | Mild <i>vs</i> Severe |                  | Mild <i>vs</i> Critical |                 | Moderate <i>vs</i> Severe |                  | Moderate <i>vs</i> Critical |                 | Severe <i>vs</i> Critical |                 |
|              |                   | <i>p</i>                | OR [95% CI]     | <i>p</i>              | OR [95% CI]      | <i>p</i>                | OR [95% CI]     | <i>p</i>                  | OR [95% CI]      | <i>p</i>                    | OR [95% CI]     | <i>p</i>                  | OR [95% CI]     |
| <i>NLRP1</i> | <b>rs12150220</b> |                         |                 |                       |                  |                         |                 |                           |                  |                             |                 |                           |                 |
|              | <b>AA</b>         | -                       | Ref.            | -                     | Ref.             | -                       | Ref.            | -                         | Ref.             | -                           | Ref.            | -                         | Ref.            |
|              | <b>AT</b>         | 0.89                    | 0.94[0.42-2.11] | 0.47                  | 0.73[0.31-1.72]  | 0.97                    | 0.98[0.44-2.20] | 0.16                      | 0.58[0.27-1.24]  | 0.58                        | 0.82[0.40-1.67] | 0.41                      | 1.33[0.68-2.58] |
|              | <b>TT</b>         | 0.61                    | 0.76[0.27-2.17] | 0.72                  | 0.81[0.25-2.62]  | 0.14                    | 0.45[0.16-1.30] | 0.97                      | 1.02[0.40-2.62]  | 0.74                        | 0.87[0.37-2.04] | 0.82                      | 0.91[0.40-2.06] |
|              | <b>A</b>          | -                       | Ref.            | -                     | Ref.             | -                       | Ref.            | -                         | Ref.             | -                           | Ref.            | -                         | Ref.            |
|              | <b>T</b>          | 0.64                    | 0.89[0.54-1.46] | 0.66                  | 0.89[0.53-1.50]  | 0.19                    | 0.72[0.44-1.18] | 0.88                      | 0.97[0.62-1.50]  | 0.71                        | 0.92[0.60-1.42] | 0.90                      | 0.98[0.66-1.44] |
|              | <b>rs6502867</b>  |                         |                 |                       |                  |                         |                 |                           |                  |                             |                 |                           |                 |
|              | <b>TT</b>         | -                       | Ref.            | -                     | Ref.             | -                       | Ref.            | -                         | Ref.             | -                           | Ref.            | -                         | Ref.            |
|              | <b>TC</b>         | 0.26                    | 0.65[0.31-1.38] | 0.44                  | 0.73[0.33-1.62]  | 0.84                    | 1.07[0.51-2.30] | 0.50                      | 1.26[0.65-2.44]  | 0.58                        | 1.20[0.63-2.31] | 0.79                      | 1.08[0.61-1.93] |
|              | <b>CC</b>         | 0.78                    | 0.84[0.24-2.93] | 0.12                  | 4.05[0.71-23.13] | 0.21                    | 2.29[0.63-8.30] | 0.07                      | 4.29[0.87-21.03] | 0.68                        | 1.30[0.38-4.49] | 0.37                      | 0.53[0.13-2.14] |
|              | <b>T</b>          | -                       | Ref.            | -                     | Ref.             | -                       | Ref.            | -                         | Ref.             | -                           | Ref.            | -                         | Ref.            |
|              | <b>C</b>          | 0.41                    | 0.79[0.46-1.37] | 0.61                  | 1.17[0.64-2.11]  | 0.31                    | 1.33[0.76-2.33] | 0.15                      | 1.47[0.87-2.40]  | 0.56                        | 1.15[0.71-1.87] | 0.74                      | 0.93[0.59-1.45] |

COVID-19: coronavirus 19 disease.

**Table S4.** Differences in *CARD8* genotype and allele distribution between COVID-19 mild patients and moderate patients, severe patients as well as critical patients.

| Locus | SNP        | COVID-19 Patients       |                 |                       |                 |                         |                 |                           |                 |                             |                 |                           |                  |
|-------|------------|-------------------------|-----------------|-----------------------|-----------------|-------------------------|-----------------|---------------------------|-----------------|-----------------------------|-----------------|---------------------------|------------------|
|       |            | Mild <i>vs</i> moderate |                 | Mild <i>vs</i> Severe |                 | Mild <i>vs</i> Critical |                 | Moderate <i>vs</i> Severe |                 | Moderate <i>vs</i> Critical |                 | Severe <i>vs</i> Critical |                  |
|       |            | <i>p</i>                | OR [95% CI]     | <i>p</i>              | OR [95% CI]     | <i>p</i>                | OR [95% CI]     | <i>p</i>                  | OR [95% CI]     | <i>p</i>                    | OR [95% CI]     | <i>p</i>                  | OR [95% CI]      |
| CARD8 | rs11672725 |                         |                 |                       |                 |                         |                 |                           |                 |                             |                 |                           |                  |
|       | CC         | -                       | Ref.            | -                     | Ref.            | -                       | Ref.            | -                         | Ref.            | -                           | Ref.            | -                         | Ref.             |
|       | CT         | 0.37                    | 1.43[0.65-3.15] | 0.50                  | 1.32[0.59-2.98] | 0.39                    | 0.73[0.35-1.51] | 0.72                      | 1.14[0.55-2.35] | 0.08                        | 0.55[0.28-1.07] | 0.06                      | 0.56[0.30-1.04]  |
|       | TT         | 0.23                    | 0.32[0.05-2.07] | 0.16                  | 0.21[0.02-1.85] | 0.25                    | 0.31[0.04-2.28] | 0.93                      | 1.08[0.20-5.93] | 0.63                        | 0.69[0.15-3.12] | 0.50                      | 0.60[0.13-2.70]  |
|       | C          | -                       | Ref.            | -                     | Ref.            | -                       | Ref.            | -                         | Ref.            | -                           | Ref.            | -                         | Ref.             |
|       | T          | 0.90                    | 0.96[0.51-1.79] | 0.90                  | 0.96[0.48-1.90] | 0.23                    | 0.69[0.38-1.26] | 0.75                      | 1.10[0.61-1.99] | 0.13                        | 0.66[0.38-1.13] | 0.09                      | 0.654[0.39-1.06] |
|       | rs6509365  |                         |                 |                       |                 |                         |                 |                           |                 |                             |                 |                           |                  |
|       | AA         | -                       | Ref.            | -                     | Ref.            | -                       | Ref.            | -                         | Ref.            | -                           | Ref.            | -                         | Ref.             |
|       | AG         | 0.01*                   | 0.36[0.16-0.79] | 0.008                 | 0.34[0.15-0.76] | 0.56                    | 0.79[0.36-1.73] | 0.26                      | 0.68[0.35-1.33] | 0.23                        | 1.49[0.77-2.87] | 0.01*                     | 2.16[1.19-3.90]  |
|       | GG         | 0.63                    | 0.76[0.24-2.38] | 0.67                  | 1.30[0.38-4.46] | 0.93                    | 0.95[0.31-2.92] | 0.84                      | 0.89[0.29-2.76] | 0.76                        | 0.85[0.30-2.42] | 0.63                      | 0.78[0.27-2.20]  |
|       | A          | -                       | Ref.            | -                     | Ref.            | -                       | Ref.            | -                         | Ref.            | -                           | Ref.            | -                         | Ref.             |
|       | G          | 0.09                    | 0.63[0.37-1.08] | 0.30                  | 0.74[0.43-1.30] | 0.70                    | 0.90[0.52-1.56] | 0.51                      | 0.86[0.54-1.36] | 0.72                        | 1.09[0.68-1.73] | 0.32                      | 1.23[0.82-1.86]  |
|       | rs2043211  |                         |                 |                       |                 |                         |                 |                           |                 |                             |                 |                           |                  |
|       | AA         | -                       | Ref.            | -                     | Ref.            | -                       | Ref.            | -                         | Ref.            | -                           | Ref.            | -                         | Ref.             |
|       | AT         | 0.02*                   | 0.40[0.18-0.89] | 0.01*                 | 0.36[0.16-0.81] | 0.56                    | 0.79[0.37-1.72] | 0.15                      | 0.61[0.31-1.20] | 0.52                        | 1.24[0.65-2.37] | 0.02*                     | 2.01[1.12-3.63]  |
|       | TT         | 0.93                    | 0.95[0.29-3.07] | 0.66                  | 1.32[0.38-4.54] | 0.94                    | 1.04[0.34-3.21] | 0.53                      | 0.69[0.22-2.18] | 0.53                        | 0.70[0.24-2.10] | 0.72                      | 0.83[0.29-2.37]  |
|       | A          | -                       | Ref.            | -                     | Ref.            | -                       | Ref.            | -                         | Ref.            | -                           | Ref.            | -                         | Ref.             |
|       | T          | 0.21                    | 0.70[0.41-1.21] | 0.36                  | 0.77[0.44-1.35] | 0.81                    | 0.94[0.54-1.62] | 0.25                      | 0.76[0.47-1.22] | 0.90                        | 0.97[0.61-1.55] | 0.32                      | 1.23[0.81-1.86]  |

COVID-19: coronavirus 19 disease. \*The statistical significance was lost after correcting for multiple testing using the Benjamini-Hochberg method for a False Discovery Rate (FDR) of 5%.

**Table S5.** Differences in *CASP1* genotype and allele distribution between COVID-19 mild patients and moderate patients, severe patients as well as critical patients.

| Locus | SNP      | COVID-19 Patients       |                  |                       |                  |                         |                  |                           |                  |                             |                  |                           |                 |
|-------|----------|-------------------------|------------------|-----------------------|------------------|-------------------------|------------------|---------------------------|------------------|-----------------------------|------------------|---------------------------|-----------------|
|       |          | Mild <i>vs</i> moderate |                  | Mild <i>vs</i> Severe |                  | Mild <i>vs</i> Critical |                  | Moderate <i>vs</i> Severe |                  | Moderate <i>vs</i> Critical |                  | Severe <i>vs</i> Critical |                 |
|       |          | <i>p</i>                | OR [95% CI]      | <i>p</i>              | OR [95% CI]      | <i>p</i>                | OR [95% CI]      | <i>p</i>                  | OR [95% CI]      | <i>p</i>                    | OR [95% CI]      | <i>p</i>                  | OR [95% CI]     |
| CASP1 | rs501192 |                         |                  |                       |                  |                         |                  |                           |                  |                             |                  |                           |                 |
|       | CC       | -                       | Ref.             | -                     | Ref.             | -                       | Ref.             | -                         | Ref.             | -                           | Ref.             | -                         | Ref.            |
|       | CT       | 0.04                    | 4.47[1.84-10.89] | 0.20                  | 1.68[0.76-3.70]  | 0.75                    | 1.13[0.54-2.36]  | 0.12                      | 0.54[0.25-1.17]  | 0.01*                       | 0.38[0.18-0.81]  | 0.32                      | 0.73[0.39-1.35] |
|       | TT       | 0.73                    | 0.73[0.12-4.33]  | 0.90                  | 1.12[0.18-7.16]  | 0.64                    | 1.56[0.25-9.88]  | 0.59                      | 1.43[0.39-5.27]  | 0.44                        | 1.71[0.43-6.79]  | 0.46                      | 1.65[0.43-6.33] |
|       | C        | -                       | Ref.             | -                     | Ref.             | -                       | Ref.             | -                         | Ref.             | -                           | Ref.             | -                         | Ref.            |
|       | T        | 0.05                    | 1.95[1.01-3.74]  | 0.33                  | 1.36[0.73-2.54]  | 0.64                    | 1.15[0.64-2.10]  | 0.56                      | 0.84[0.47-1.50]  | 0.25                        | 0.72[0.41-1.26]  | 0.82                      | 0.94[0.58-1.54] |
|       | rs488992 |                         |                  |                       |                  |                         |                  |                           |                  |                             |                  |                           |                 |
|       | GG       | -                       | Ref.             | -                     | Ref.             | -                       | Ref.             | -                         | Ref.             | -                           | Ref.             | -                         | Ref.            |
|       | GA       | 0.31                    | 1.73[0.60-4.93]  | 0.47                  | 1.46[0.52-4.06]  | 0.49                    | 0.72[0.28-1.84]  | 0.71                      | 1.19[0.47-3.00]  | 0.33                        | 0.66[0.29-1.52]  | 0.24                      | 0.64[0.30-1.36] |
|       | AA       | 0.76                    | 0.68[0.05-8.42]  | 0.66                  | 1.87[0.11-31.39] | 0.85                    | 1.29[0.10-17.48] | 0.57                      | 1.88[0.21-16.72] | 0.73                        | 1.44[0.18-11.52] | 0.94                      | 1.08[0.14-8.16] |
|       | G        | -                       | Ref.             | -                     | Ref.             | -                       | Ref.             | -                         | Ref.             | -                           | Ref.             | -                         | Ref.            |
|       | A        | 0.55                    | 1.30[0.54-3.12]  | 0.40                  | 1.46[0.60-3.55]  | 0.64                    | 0.82[0.36-1.86]  | 0.50                      | 1.31[0.60-2.85]  | 0.56                        | 0.81[0.40-1.64]  | 0.35                      | 0.73[0.38-1.41] |

COVID-19: coronavirus 19 disease. \*The statistical significance was lost after correcting for multiple testing using the Benjamini-Hochberg method for a False Discovery Rate (FDR) of 5%.

**Table S6.** Differences in *IL1B* genotype and allele distribution between COVID-19 mild patients and moderate patients, severe patients as well as critical patients.

|       |           | COVID-19 Patients       |                  |                       |                 |                         |                 |                           |                 |                             |                 |                           |                 |
|-------|-----------|-------------------------|------------------|-----------------------|-----------------|-------------------------|-----------------|---------------------------|-----------------|-----------------------------|-----------------|---------------------------|-----------------|
| Locus | SNP       | Mild <i>vs</i> moderate |                  | Mild <i>vs</i> Severe |                 | Mild <i>vs</i> Critical |                 | Moderate <i>vs</i> Severe |                 | Moderate <i>vs</i> Critical |                 | Severe <i>vs</i> Critical |                 |
|       |           | <i>p</i>                | OR [95% CI]      | <i>p</i>              | OR [95% CI]     | <i>p</i>                | OR [95% CI]     | <i>p</i>                  | OR [95% CI]     | <i>p</i>                    | OR [95% CI]     | <i>p</i>                  | OR [95% CI]     |
| IL1B  | rs1143634 |                         |                  |                       |                 |                         |                 |                           |                 |                             |                 |                           |                 |
|       | GG        | -                       | Ref.             | -                     | Ref.            | -                       | Ref.            | -                         | Ref.            | -                           | Ref.            | -                         | Ref.            |
|       | GA        | 0.93                    | 1.04[0.49-2.17]  | 0.22                  | 0.61[0.27-1.36] | 0.19                    | 0.60[0.28-1.29] | 0.79                      | 0.91[0.47-1.78] | 0.65                        | 0.86[0.45-1.64] | 0.71                      | 0.90[0.50-1.59] |
|       | AA        | 0.33                    | 2.76[0.36-21.11] | 0.84                  | 0.84[0.15-4.76] | 0.79                    | 1.27[0.22-7.28] | 0.35                      | 0.42[0.07-2.57] | 0.86                        | 0.83[0.11-6.06] | 0.51                      | 1.60[0.40-6.44] |
|       | G         | -                       | Ref.             | -                     | Ref.            | -                       | Ref.            | -                         | Ref.            | -                           | Ref.            | -                         | Ref.            |
|       | A         | 0.56                    | 1.20[0.65-2.20]  | 0.32                  | 0.72[0.38-1.37] | 0.41                    | 0.78[0.42-1.43] | 0.47                      | 0.82[0.48-1.41] | 0.66                        | 0.89[0.52-1.52] | 0.92                      | 1.02[0.64-1.63] |
|       | rs16944   |                         |                  |                       |                 |                         |                 |                           |                 |                             |                 |                           |                 |
|       | GG        | -                       | Ref.             | -                     | Ref.            | -                       | Ref.            | -                         | Ref.            | -                           | Ref.            | -                         | Ref.            |
|       | GA        | 0.92                    | 0.96[0.45-2.03]  | 0.95                  | 1.02[0.48-2.19] | 0.74                    | 0.88[0.43-1.84] | 0.72                      | 0.88[0.45-1.73] | 0.57                        | 0.82[0.42-1.60] | 0.70                      | 0.89[0.50-1.60] |
|       | AA        | 0.09                    | 0.35[0.10-1.16]  | 0.59                  | 0.70[0.19-2.60] | 0.83                    | 0.88[0.27-2.86] | 0.28                      | 1.76[0.63-4.89] | 0.55                        | 1.33[0.52-3.40] | 0.42                      | 0.68[0.26-1.74] |
|       | G         | -                       | Ref.             | -                     | Ref.            | -                       | Ref.            | -                         | Ref.            | -                           | Ref.            | -                         | Ref.            |
|       | A         | 0.16                    | 0.68[0.40-1.16]  | 0.74                  | 0.91[0.52-1.58] | 0.76                    | 0.92[0.55-1.55] | 0.49                      | 1.18[0.74-1.89] | 0.80                        | 1.06[0.67-1.67] | 0.43                      | 0.85[0.56-1.28] |

COVID-19: coronavirus 19 disease.

**Table S7.** Differences in *IL18* genotype and allele distribution between COVID-19 mild patients and moderate patients, severe patients as well as critical patients.

|       |          | COVID-19 Patients       |                 |                       |                 |                         |                 |                           |                 |                             |                 |                           |                 |
|-------|----------|-------------------------|-----------------|-----------------------|-----------------|-------------------------|-----------------|---------------------------|-----------------|-----------------------------|-----------------|---------------------------|-----------------|
| Locus | SNP      | Mild <i>vs</i> moderate |                 | Mild <i>vs</i> Severe |                 | Mild <i>vs</i> Critical |                 | Moderate <i>vs</i> Severe |                 | Moderate <i>vs</i> Critical |                 | Severe <i>vs</i> Critical |                 |
|       |          | <i>p</i>                | OR [95% CI]     | <i>p</i>              | OR [95% CI]     | <i>p</i>                | OR [95% CI]     | <i>p</i>                  | OR [95% CI]     | <i>p</i>                    | OR [95% CI]     | <i>p</i>                  | OR [95% CI]     |
| IL18  | rs187238 |                         |                 |                       |                 |                         |                 |                           |                 |                             |                 |                           |                 |
|       | CC       | -                       | Ref.            | -                     | Ref.            | -                       | Ref.            | -                         | Ref.            | -                           | Ref.            | -                         | Ref.            |
|       | CG       | 0.58                    | 1.24[0.59-2.60] | 0.03*                 | 2.43[1.09-5.43] | 0.16                    | 1.71[0.81-3.61] | 0.08                      | 1.87[0.94-3.74] | 0.41                        | 1.32[0.68-2.54] | 0.12                      | 0.61[0.33-1.14] |
|       | GG       | 0.98                    | 0.99[0.27-3.55] | 0.46                  | 1.64[0.44-6.13] | 0.65                    | 1.39[0.34-5.62] | 0.66                      | 1.27[0.43-3.72] | 0.44                        | 1.58[0.50-5.03] | 0.54                      | 1.40[0.47-4.11] |
|       | C        | -                       | Ref.            | -                     | Ref.            | -                       | Ref.            | -                         | Ref.            | -                           | Ref.            | -                         | Ref.            |
|       | G        | 0.77                    | 1.09[0.63-1.86] | 0.07                  | 1.71[0.95-3.07] | 0.24                    | 1.39[0.80-2.42] | 0.19                      | 1.40[0.85-2.32] | 0.30                        | 1.29[0.79-2.10] | 0.61                      | 0.89[0.56-1.41] |

COVID-19: coronavirus 19 disease. \*The statistical significance was lost after correcting for multiple testing using the Benjamini-Hochberg method for a False Discovery Rate (FDR) of 5%.

**Table S8.** Differences in *NFKB1* genotype and allele distribution between COVID-19 mild patients and moderate patients, severe patients as well as critical patients.

|       |                       | COVID-19 Patients       |                  |                       |                 |                         |                 |                           |                 |                             |                 |                           |                 |
|-------|-----------------------|-------------------------|------------------|-----------------------|-----------------|-------------------------|-----------------|---------------------------|-----------------|-----------------------------|-----------------|---------------------------|-----------------|
| Locus | SNP                   | Mild <i>vs</i> moderate |                  | Mild <i>vs</i> Severe |                 | Mild <i>vs</i> Critical |                 | Moderate <i>vs</i> Severe |                 | Moderate <i>vs</i> Critical |                 | Severe <i>vs</i> Critical |                 |
|       |                       | <i>p</i>                | OR [95% CI]      | <i>p</i>              | OR [95% CI]     | <i>p</i>                | OR [95% CI]     | <i>p</i>                  | OR [95% CI]     | <i>p</i>                    | OR [95% CI]     | <i>p</i>                  | OR [95% CI]     |
| NFKB1 | rs28362491            |                         |                  |                       |                 |                         |                 |                           |                 |                             |                 |                           |                 |
|       | ATTGATTG/<br>ATTGATTG | -                       | Ref.             | -                     | Ref.            | -                       | Ref.            | -                         | Ref.            | -                           | Ref.            | -                         | Ref.            |
|       | ATTGATTG/ ATTG        | 0.78                    | 1.11[0.53-2.36]  | 0.53                  | 1.29[0.58-2.86] | 0.18                    | 1.68[0.79-3.58] | 0.59                      | 1.20[0.62-2.35] | 0.11                        | 1.70[0.89-3.26] | 0.09                      | 1.68[0.93-3.06] |
|       | ATTG/ ATTG            | 0.02*                   | 5.16[1.25-21.37] | 0.32                  | 1.84[0.55-6.18] | 0.14                    | 2.38[0.75-7.49] | 0.18                      | 0.45[0.14-1.44] | 0.34                        | 0.54[0.16-1.88] | 0.48                      | 1.37[0.57-3.27] |
|       | ATTGATTG              | -                       | Ref.             | -                     | Ref.            | -                       | Ref.            | -                         | Ref.            | -                           | Ref.            | -                         | Ref.            |
|       | ATTG                  | 0.12                    | 1.50[0.89-2.51]  | 0.33                  | 1.31[0.76-2.23] | 0.09                    | 1.56[0.93-2.62] | 0.49                      | 0.85[0.54-1.34] | 0.83                        | 1.05[0.66-1.66] | 0.20                      | 1.31[0.87-1.97] |

COVID-19: coronavirus 19 disease. \*The statistical significance was lost after correcting for multiple testing using the Benjamini-Hochberg method for a False Discovery Rate (FDR) of 5%.

**Table S9.** Differences in *ATG16L1* genotype and allele distribution between COVID-19 mild patients and moderate patients, severe patients as well as critical patients.

|         |           | COVID-19 Patients       |                 |                       |                  |                         |                  |                           |                 |                             |                 |                           |                 |
|---------|-----------|-------------------------|-----------------|-----------------------|------------------|-------------------------|------------------|---------------------------|-----------------|-----------------------------|-----------------|---------------------------|-----------------|
| Locus   | SNP       | Mild <i>vs</i> moderate |                 | Mild <i>vs</i> Severe |                  | Mild <i>vs</i> Critical |                  | Moderate <i>vs</i> Severe |                 | Moderate <i>vs</i> Critical |                 | Severe <i>vs</i> Critical |                 |
|         |           | <i>p</i>                | OR [95% CI]     | <i>p</i>              | OR [95% CI]      | <i>p</i>                | OR [95% CI]      | <i>p</i>                  | OR [95% CI]     | <i>p</i>                    | OR [95% CI]     | <i>p</i>                  | OR [95% CI]     |
| ATG16L1 | rs2241880 |                         |                 |                       |                  |                         |                  |                           |                 |                             |                 |                           |                 |
|         | GG        | -                       | Ref.            | -                     | Ref.             | -                       | Ref.             | -                         | Ref.            | -                           | Ref.            | -                         | Ref.            |
|         | GA        | 0.69                    | 1.20[0.50-2.91] | 0.95                  | 1.03[0.41-2.55]  | 0.75                    | 1.15[0.48-2.74]  | 0.92                      | 0.96[0.45-2.05] | 0.83                        | 1.09[0.52-2.28] | 0.80                      | 1.09[0.57-2.07] |
|         | AA        | 0.98                    | 0.99[0.37-2.62] | 0.28                  | 1.79[0.63-5.06]  | 0.23                    | 1.83[0.68-4.96]  | 0.53                      | 1.32[0.55-3.17] | 0.29                        | 1.59[0.68-3.73] | 0.98                      | 0.99[0.45-2.15] |
|         | G         | -                       | Ref.            | -                     | Ref.             | -                       | Ref.             | -                         | Ref.            | -                           | Ref.            | -                         | Ref.            |
|         | A         | 0.95                    | 0.98[0.61-1.60] | 0.28                  | 1.33[0.80-2.21]  | 0.23                    | 1.34[0.83-2.19]  | 0.54                      | 1.15[0.74-1.78] | 0.29                        | 1.26[0.82-1.94] | 1.00                      | 1.00[0.68-1.47] |
|         | rs6754677 |                         |                 |                       |                  |                         |                  |                           |                 |                             |                 |                           |                 |
|         | AA        | -                       | Ref.            | -                     | Ref.             | -                       | Ref.             | -                         | Ref.            | -                           | Ref.            | -                         | Ref.            |
|         | AG        | 0.75                    | 1.13[0.52-2.45] | 0.26                  | 1.66[0.73-3.79]  | 0.81                    | 1.11[0.50-2.45]  | 0.28                      | 1.45[0.74-2.84] | 0.68                        | 1.15[0.59-2.23] | 0.39                      | 0.77[0.43-1.38] |
|         | GG        | 0.55                    | 1.37[0.49-3.81] | 0.01*                 | 4.31[1.36-13.62] | 0.01*                   | 4.03[1.31-12.36] | 0.44                      | 1.48[0.54-4.01] | 0.46                        | 1.44[0.55-3.77] | 0.42                      | 0.68[0.27-1.73] |
|         | A         | -                       | Ref.            | -                     | Ref.             | -                       | Ref.             | -                         | Ref.            | -                           | Ref.            | -                         | Ref.            |
|         | G         | 0.55                    | 1.16[0.71-1.91] | 0.01*                 | 1.96[1.15-3.34]  | 0.04*                   | 1.68[1.02-2.79]  | 0.30                      | 1.28[0.81-2.02] | 0.47                        | 1.18[0.76-1.83] | 0.32                      | 0.81[0.54-1.22] |

COVID-19: coronavirus 19 disease. \*The statistical significance was lost after correcting for multiple testing using the Benjamini-Hochberg method for a False Discovery Rate (FDR) of 5%.

**Table S10.** Differences in *MIF* genotype and allele distribution between COVID-19 mild patients and moderate patients, severe patients as well as critical patients.

| <i>Locus</i> | SNP             | COVID-19 Patients       |                 |                       |                  |                         |                 |                           |                  |                             |                 |                           |                 |
|--------------|-----------------|-------------------------|-----------------|-----------------------|------------------|-------------------------|-----------------|---------------------------|------------------|-----------------------------|-----------------|---------------------------|-----------------|
|              |                 | Mild <i>vs</i> moderate |                 | Mild <i>vs</i> Severe |                  | Mild <i>vs</i> Critical |                 | Moderate <i>vs</i> Severe |                  | Moderate <i>vs</i> Critical |                 | Severe <i>vs</i> Critical |                 |
|              |                 | <i>p</i>                | OR [95% CI]     | <i>p</i>              | OR [95% CI]      | <i>p</i>                | OR [95% CI]     | <i>p</i>                  | OR [95% CI]      | <i>p</i>                    | OR [95% CI]     | <i>p</i>                  | OR [95% CI]     |
| <i>MIF</i>   | <b>rs755622</b> |                         |                 |                       |                  |                         |                 |                           |                  |                             |                 |                           |                 |
|              | <b>GG</b>       | -                       | Ref.            | -                     | Ref.             | -                       | Ref.            | -                         | Ref.             | -                           | Ref.            | -                         | Ref.            |
|              | <b>GC</b>       | 0.19                    | 1.70[0.77-3.72] | 0.90                  | 1.05[0.49-2.29]  | 0.44                    | 1.35[0.63-2.91] | 0.22                      | 0.63[0.30-1.32]  | 0.48                        | 0.77[0.37-1.59] | 0.44                      | 1.27[0.69-2.37] |
|              | <b>CC</b>       | 0.56                    | 0.50[0.05-5.20] | 0.73                  | 1.77[0.07-45.80] | 0.52                    | 0.52[0.07-3.84] | 0.29                      | 4.02[0.32-51.01] | 0.79                        | 0.77[0.12-4.83] | 0.22                      | 0.24[0.03-2.30] |
|              | <b>G</b>        | -                       | Ref.            | -                     | Ref.             | -                       | Ref.            | -                         | Ref.             | -                           | Ref.            | -                         | Ref.            |
|              | <b>C</b>        | 0.43                    | 1.31[0.67-2.56] | 0.82                  | 1.08[0.55-2.10]  | 0.85                    | 1.07[0.56-2.02] | 0.60                      | 0.85[0.45-1.58]  | 0.48                        | 0.80[0.44-1.47] | 0.95                      | 0.98[0.58-1.67] |

COVID-19: coronavirus 19 disease.

**Table S11.** Differences in *NLRP3* and *NLRC4* genotype and allele distribution between COVID-19 patients and healthy controls.

| <i>Locus</i> | SNP               | Mild COVID-19 patients vs Healthy Controls |                  | Moderate COVID-19 patients vs Healthy Controls |                  | Severe COVID-19 patients vs Healthy Controls |                  | Critical COVID-19 patients vs Healthy Controls |                  |
|--------------|-------------------|--------------------------------------------|------------------|------------------------------------------------|------------------|----------------------------------------------|------------------|------------------------------------------------|------------------|
|              |                   | <i>p</i>                                   | OR [95% CI]      | <i>p</i>                                       | OR [95% CI]      | <i>p</i>                                     | OR [95% CI]      | <i>p</i>                                       | OR [95% CI]      |
|              |                   |                                            |                  |                                                |                  |                                              |                  |                                                |                  |
| <i>NLRP3</i> | <b>rs4925659</b>  |                                            |                  |                                                |                  |                                              |                  |                                                |                  |
|              | GG                | -                                          | Ref.             | -                                              | Ref.             | -                                            | Ref.             | -                                              | Ref.             |
|              | GA                | 0.12                                       | 1.66 [0.87-3.14] | 0.18                                           | 0.68 [0.39-1.19] | 0.79                                         | 0.93 [0.55-1.58] | 0.57                                           | 0.87 [0.53-1.42] |
|              | AA                | 0.02*                                      | 2.64 [1.15-6.07] | 0.84                                           | 1.09 [0.50-2.38] | 0.45                                         | 1.34 [0.63-2.83] | 0.53                                           | 1.26 [0.62-2.55] |
|              | G                 | -                                          | Ref.             | -                                              | Ref.             | -                                            | Ref.             | -                                              | Ref.             |
|              | A                 | 0.03*                                      | 1.56 [1.05-2.30] | 0.71                                           | 0.93 [0.64-1.36] | 0.62                                         | 1.09 [0.77-1.56] | 0.77                                           | 1.05 [0.75-1.47] |
|              | <b>rs10159239</b> |                                            |                  |                                                |                  |                                              |                  |                                                |                  |
|              | AA                | -                                          | Ref.             | -                                              | Ref.             | -                                            | Ref.             | -                                              | Ref.             |
|              | AG                | 0.42                                       | 0.78 [0.43-1.43] | 0.15                                           | 0.63 [0.34-1.18] | 0.40                                         | 1.29 [0.71-2.36] | 0.19                                           | 1.47 [0.83-2.59] |
|              | GG                | 0.05                                       | 0.43 [0.18-1.01] | 0.40                                           | 1.33 [0.68-2.61] | 0.56                                         | 1.24 [0.60-2.54] | 0.40                                           | 1.34 [0.68-2.64] |
|              | A                 | -                                          | Ref.             | -                                              | Ref.             | -                                            | Ref.             | -                                              | Ref.             |
|              | G                 | 0.07                                       | 0.69 [0.47-1.03] | 0.41                                           | 1.17 [0.81-1.68] | 0.55                                         | 1.11 [0.79-1.57] | 0.40                                           | 1.15 [0.83-1.59] |
|              | <b>rs10754558</b> |                                            |                  |                                                |                  |                                              |                  |                                                |                  |
|              | CC                | -                                          | Ref.             | -                                              | Ref.             | -                                            | Ref.             | -                                              | Ref.             |
|              | CG                | 0.06                                       | 0.57 [0.31-1.03] | 0.14                                           | 0.63 [0.34-1.17] | 0.30                                         | 1.35 [0.76-2.40] | 0.28                                           | 1.35 [0.78-2.32] |
|              | GG                | 0.03*                                      | 0.38 [0.16-0.92] | 0.18                                           | 1.58 [0.81-3.09] | 0.69                                         | 1.16 [0.56-2.39] | 0.65                                           | 1.17 [0.59-2.31] |
|              | C                 | -                                          | Ref.             | -                                              | Ref.             | -                                            | Ref.             | -                                              | Ref.             |
|              | G                 | 0.02*                                      | 0.61 [0.41-0.92] | 0.21                                           | 1.26 [0.88-1.82] | 0.61                                         | 1.09 [0.78-1.54] | 0.58                                           | 1.10 [0.79-1.52] |
|              | <b>rs4353135</b>  |                                            |                  |                                                |                  |                                              |                  |                                                |                  |
|              | TT                | -                                          | Ref.             | -                                              | Ref.             | -                                            | Ref.             | -                                              | Ref.             |
|              | TG                | 0.08                                       | 0.58 [0.32-1.06] | 0.41                                           | 1.28 [0.71-2.30] | 0.41                                         | 1.26 [0.72-2.20] | 0.29                                           | 0.76 [0.45-1.27] |
|              | GG                | 0.48                                       | 0.74 [0.32-1.72] | 0.69                                           | 1.19 [0.52-2.71] | 0.67                                         | 1.19 [0.54-2.59] | 0.45                                           | 1.29 [0.66-2.53] |
|              | T                 | -                                          | Ref.             | -                                              | Ref.             | -                                            | Ref.             | -                                              | Ref.             |
|              | G                 | 0.19                                       | 0.76 [0.51-1.15] | 0.58                                           | 1.11 [0.77-1.61] | 0.56                                         | 1.11 [0.78-1.58] | 0.73                                           | 1.06 [0.76-1.48] |
| <i>NLRC4</i> | <b>rs385076</b>   |                                            |                  |                                                |                  |                                              |                  |                                                |                  |
|              | CC                | -                                          | Ref.             | -                                              | Ref.             | -                                            | Ref.             | -                                              | Ref.             |
|              | CT                | 0.58                                       | 0.85 [0.47-1.52] | 0.31                                           | 0.74 [0.42-1.31] | 0.83                                         | 1.06 [0.62-1.81] | 0.06                                           | 0.62 [0.38-1.02] |
|              | TT                | 0.40                                       | 0.68 [0.27-1.67] | 0.66                                           | 1.19 [0.56-2.51] | 0.99                                         | 1.01 [0.47-2.17] | 0.08                                           | 0.51 [0.24-1.10] |
|              | C                 | -                                          | Ref.             | -                                              | Ref.             | -                                            | Ref.             | -                                              | Ref.             |
|              | T                 | 0.35                                       | 0.83 [0.55-1.23] | 0.95                                           | 1.01 [0.70-1.47] | 0.94                                         | 1.01 [0.72-1.44] | 0.04*                                          | 0.70 [0.50-0.98] |
|              | <b>rs479333</b>   |                                            |                  |                                                |                  |                                              |                  |                                                |                  |
|              | GG                | -                                          | Ref.             | -                                              | Ref.             | -                                            | Ref.             | -                                              | Ref.             |
|              | GC                | 0.67                                       | 0.88 [0.48-1.60] | 0.20                                           | 0.68 [0.37-1.22] | 0.82                                         | 1.07 [0.61-1.86] | 0.04*                                          | 0.59 [0.36-0.98] |
|              | CC                | 0.56                                       | 0.77 [0.33-1.81] | 0.52                                           | 1.27 [0.62-2.61] | 1.00                                         | 1.00 [0.47-2.14] | 0.22                                           | 0.65 [0.32-1.30] |
|              | G                 | -                                          | Ref.             | -                                              | Ref.             | -                                            | Ref.             | -                                              | Ref.             |
|              | C                 | 0.50                                       | 0.87 [0.59-1.29] | 0.77                                           | 1.06 [0.73-1.53] | 0.95                                         | 1.01 [0.71-1.43] | 0.10                                           | 0.75 [0.54-1.05] |

COVID-19: coronavirus 19 disease. \*The statistical significance was lost after correcting for multiple testing using the Benjamini-Hochberg method for a False Discovery Rate (FDR) of 5%.

**Table S12.** Differences in *NLRP1* genotype and allele distribution between COVID-19 patients and healthy controls.

| <i>Locus</i> | SNP               | Mild COVID-19 patients vs Healthy Controls |                  | Moderate COVID-19 patients vs Healthy Controls |                  | Severe COVID-19 patients vs Healthy Controls |                  | Critical COVID-19 patients vs Healthy Controls |                  |
|--------------|-------------------|--------------------------------------------|------------------|------------------------------------------------|------------------|----------------------------------------------|------------------|------------------------------------------------|------------------|
|              |                   | <i>p</i>                                   | OR [95% CI]      | <i>p</i>                                       | OR [95% CI]      | <i>p</i>                                     | OR [95% CI]      | <i>p</i>                                       | OR [95% CI]      |
|              |                   |                                            |                  |                                                |                  |                                              |                  |                                                |                  |
| <i>NLRP1</i> | <b>rs4790797</b>  |                                            |                  |                                                |                  |                                              |                  |                                                |                  |
|              | GG                | -                                          | Ref.             | -                                              | Ref.             | -                                            | Ref.             | -                                              | Ref.             |
|              | GA                | 0.68                                       | 1.15 [0.60-2.21] | 0.14                                           | 1.63 [0.86-3.10] | 0.38                                         | 1.30 [0.72-2.31] | 0.97                                           | 0.99 [0.57-1.72] |
|              | AA                | 0.69                                       | 1.17 [0.55-2.50] | 0.70                                           | 1.16 [0.54-2.53] | 0.47                                         | 0.76 [0.36-1.59] | 0.64                                           | 1.16 [0.62-2.17] |
|              | G                 | -                                          | Ref.             | -                                              | Ref.             | -                                            | Ref.             | -                                              | Ref.             |
|              | A                 | 0.63                                       | 1.10 [0.75-1.62] | 0.65                                           | 1.09 [0.75-1.58] | 0.58                                         | 0.91 [0.64-1.29] | 0.64                                           | 1.08 [0.78-1.50] |
|              | <b>rs8182352</b>  |                                            |                  |                                                |                  |                                              |                  |                                                |                  |
|              | TT                | -                                          | Ref.             | -                                              | Ref.             | -                                            | Ref.             | -                                              | Ref.             |
|              | TC                | 0.72                                       | 1.13 [0.59-2.15] | 0.08                                           | 1.77 [0.93-3.34] | 0.33                                         | 1.33 [0.75-2.35] | 0.80                                           | 1.07 [0.62-1.85] |
|              | CC                | 0.86                                       | 1.07 [0.51-2.25] | 0.77                                           | 1.12 [0.52-2.41] | 0.43                                         | 0.75 [0.36-1.53] | 0.80                                           | 1.08 [0.58-2.01] |
|              | T                 | -                                          | Ref.             | -                                              | Ref.             | -                                            | Ref.             | -                                              | Ref.             |
|              | C                 | 0.79                                       | 1.05 [0.72-1.55] | 0.71                                           | 1.07 [0.75-1.54] | 0.53                                         | 0.90 [0.63-1.27] | 0.79                                           | 1.05 [0.76-1.44] |
|              | <b>rs878329</b>   |                                            |                  |                                                |                  |                                              |                  |                                                |                  |
|              | GG                | -                                          | Ref.             | -                                              | Ref.             | -                                            | Ref.             | -                                              | Ref.             |
|              | GC                | 0.74                                       | 1.12 [0.58-2.15] | 0.08                                           | 1.77 [0.94-3.31] | 0.18                                         | 1.48 [0.83-2.63] | 0.76                                           | 1.09 [0.63-1.88] |
|              | CC                | 0.75                                       | 1.12 [0.54-2.34] | 0.88                                           | 1.06 [0.50-2.26] | 0.40                                         | 0.73 [0.35-1.51] | 0.73                                           | 1.11 [0.60-2.06] |
|              | G                 | -                                          | Ref.             | -                                              | Ref.             | -                                            | Ref.             | -                                              | Ref.             |
|              | C                 | 0.68                                       | 1.08 [0.74-1.60] | 0.80                                           | 1.05 [0.73-1.51] | 0.53                                         | 0.89 [0.63-1.27] | 0.71                                           | 1.06 [0.77-1.47] |
|              | <b>rs2670660</b>  |                                            |                  |                                                |                  |                                              |                  |                                                |                  |
|              | AA                | -                                          | Ref.             | -                                              | Ref.             | -                                            | Ref.             | -                                              | Ref.             |
|              | AG                | 0.76                                       | 1.10 [0.59-2.07] | 0.25                                           | 1.43 [0.78-2.63] | 0.13                                         | 1.57 [0.88-2.80] | 0.19                                           | 1.45 [0.83-2.53] |
|              | GG                | 0.68                                       | 0.85 [0.40-1.82] | 0.95                                           | 1.02 [0.49-2.12] | 0.66                                         | 0.85 [0.41-1.75] | 0.43                                           | 1.29 [0.68-2.44] |
|              | A                 | -                                          | Ref.             | -                                              | Ref.             | -                                            | Ref.             | -                                              | Ref.             |
|              | G                 | 0.76                                       | 0.94 [0.64-1.39] | 0.87                                           | 1.03 [0.72-1.48] | 0.82                                         | 0.96 [0.68-1.36] | 0.39                                           | 1.15 [0.83-1.59] |
|              | <b>rs12150220</b> |                                            |                  |                                                |                  |                                              |                  |                                                |                  |
|              | AA                | -                                          | Ref.             | -                                              | Ref.             | -                                            | Ref.             | -                                              | Ref.             |
|              | AT                | 0.69                                       | 1.14 [0.61-2.10] | 0.63                                           | 1.16 [0.64-2.10] | 0.09                                         | 1.66 [0.92-2.99] | 0.50                                           | 1.20 [0.70-2.06] |
|              | TT                | 0.20                                       | 0.58 [0.25-1.34] | 0.91                                           | 0.96 [0.47-1.97] | 0.97                                         | 0.99 [0.47-2.06] | 0.77                                           | 1.10 [0.58-2.07] |
|              | A                 | -                                          | Ref.             | -                                              | Ref.             | -                                            | Ref.             | -                                              | Ref.             |
|              | T                 | 0.31                                       | 0.81 [0.55-1.21] | 0.96                                           | 0.99 [0.69-1.43] | 0.87                                         | 1.03 [0.73-1.46] | 0.73                                           | 1.06 [0.77-1.47] |
|              | <b>rs6502867</b>  |                                            |                  |                                                |                  |                                              |                  |                                                |                  |
|              | TT                | -                                          | Ref.             | -                                              | Ref.             | -                                            | Ref.             | -                                              | Ref.             |
|              | TC                | 0.73                                       | 1.11 [0.61-2.02] | 0.08                                           | 1.62 [0.94-2.81] | 0.10                                         | 1.55 [0.92-2.59] | 0.19                                           | 1.39 [0.85-2.27] |
|              | CC                | 0.14                                       | 2.19 [0.77-6.29] | 0.16                                           | 2.14 [0.75-6.12] | 0.67                                         | 0.75 [0.19-2.88] | 0.36                                           | 1.60 [0.59-4.37] |
|              | T                 | -                                          | Ref.             | -                                              | Ref.             | -                                            | Ref.             | -                                              | Ref.             |
|              | C                 | 0.27                                       | 1.29 [0.82-2.03] | 0.04*                                          | 1.53 [1.01-2.32] | 0.35                                         | 1.22 [0.81-1.84] | 0.15                                           | 1.33 [0.90-1.94] |

COVID-19: coronavirus 19 disease. \*The statistical significance was lost after correcting for multiple testing using the Benjamini-Hochberg method for a False Discovery Rate (FDR) of 5%.

**Table S13.** Differences in *CARD8*, and *CASP1* genotype and allele distribution between COVID-19 patients and healthy controls.

| <i>Locus</i> | SNP               | Mild COVID-19 patients vs Healthy Controls |                   | Moderate COVID-19 patients vs Healthy Controls |                   | Severe COVID-19 patients vs Healthy Controls |                   | Critical COVID-19 patients vs Healthy Controls |                   |
|--------------|-------------------|--------------------------------------------|-------------------|------------------------------------------------|-------------------|----------------------------------------------|-------------------|------------------------------------------------|-------------------|
|              |                   | <i>p</i>                                   | OR [95% CI]       | <i>p</i>                                       | OR [95% CI]       | <i>p</i>                                     | OR [95% CI]       | <i>p</i>                                       | OR [95% CI]       |
| <i>CARD8</i> | <b>rs11672725</b> |                                            |                   |                                                |                   |                                              |                   |                                                |                   |
|              | CC                | -                                          | Ref.              | -                                              | Ref.              | -                                            | Ref.              | -                                              | Ref.              |
|              | CT                | 0.44                                       | 1.26[0.70-2.28]   | 0.81                                           | 0.93[0.52-1.67]   | 0.63                                         | 0.87[0.50-1.52]   | 0.07                                           | 1.57[0.96-2.57]   |
|              | TT                | 0.57                                       | 0.63[0.13-3.04]   | 0.68                                           | 1.27[0.41-3.96]   | 0.50                                         | 0.63[0.16-2.39]   | 0.94                                           | 1.05[0.34-3.24]   |
|              | C                 | -                                          | Ref.              | -                                              | Ref.              | -                                            | Ref.              | -                                              | Ref.              |
|              | T                 | 0.79                                       | 1.07[0.66-1.74]   | 0.91                                           | 1.03[0.65-1.63]   | 0.43                                         | 0.83[0.52-1.32]   | 0.18                                           | 1.31[0.88-1.94]   |
|              | <b>rs6509365</b>  |                                            |                   |                                                |                   |                                              |                   |                                                |                   |
|              | AA                | -                                          | Ref.              | -                                              | Ref.              | -                                            | Ref.              | -                                              | Ref.              |
|              | AG                | 0.01*                                      | 0.43[0.24-0.79]   | 0.50                                           | 0.83[0.48-1.42]   | 0.28                                         | 1.33[0.79-2.23]   | 0.06                                           | 0.62[0.38-1.02]   |
|              | GG                | 0.60                                       | 0.78[0.32-1.94]   | 0.75                                           | 0.86[0.35-2.15]   | 0.89                                         | 0.94[0.37-2.35]   | 0.77                                           | 0.89[0.41-1.94]   |
|              | A                 | -                                          | Ref.              | -                                              | Ref.              | -                                            | Ref.              | -                                              | Ref.              |
|              | G                 | 0.06                                       | 0.66[0.43-1.02]   | 0.58                                           | 0.90[0.61-1.32]   | 0.67                                         | 1.08[0.76-1.55]   | 0.25                                           | 0.81[0.57-1.16]   |
|              | <b>rs2043211</b>  |                                            |                   |                                                |                   |                                              |                   |                                                |                   |
|              | AA                | -                                          | Ref.              | -                                              | Ref.              | -                                            | Ref.              | -                                              | Ref.              |
|              | AT                | 0.01*                                      | 0.44[0.24-0.80]   | 0.24                                           | 0.73[0.42-1.24]   | 0.28                                         | 1.33[0.80-2.23]   | 0.09                                           | 0.66[0.41-1.07]   |
|              | TT                | 0.74                                       | 0.86[0.74-2.13]   | 0.55                                           | 0.75[0.29-1.94]   | 1.00                                         | 1.00[0.40-2.51]   | 0.74                                           | 0.87[0.39-1.94]   |
|              | A                 | -                                          | Ref.              | -                                              | Ref.              | -                                            | Ref.              | -                                              | Ref.              |
|              | T                 | 0.10                                       | 0.70[0.45-1.07]   | 0.31                                           | 0.81[0.55-1.21]   | 0.59                                         | 1.11[0.77-1.58]   | 0.27                                           | 0.82[0.58-1.16]   |
| <i>CASP1</i> | <b>rs501192</b>   |                                            |                   |                                                |                   |                                              |                   |                                                |                   |
|              | CC                | -                                          | Ref.              | -                                              | Ref.              | -                                            | Ref.              | -                                              | Ref.              |
|              | CT                | 0.45                                       | 1.25 [0.70-2.22]  | 0.04*                                          | 0.50 [0.27-0.96]  | 0.52                                         | 0.84 [0.49-1.44]  | 0.77                                           | 1.08 [0.66-1.76]  |
|              | TT                | 0.65                                       | 1.49 [0.26-8.42]  | 0.09                                           | 3.13 [0.85-11.49] | 0.11                                         | 2.88 [0.79-10.59] | 0.46                                           | 1.71 [0.42-7.05]  |
|              | C                 | -                                          | Ref.              | -                                              | Ref.              | -                                            | Ref.              | -                                              | Ref.              |
|              | T                 | 0.40                                       | 1.23 [0.76-1.98]  | 0.64                                           | 0.89 [0.55-1.45]  | 0.65                                         | 1.11 [0.72-1.71]  | 0.55                                           | 1.13 [0.75-1.71]  |
|              | <b>rs488992</b>   |                                            |                   |                                                |                   |                                              |                   |                                                |                   |
|              | GG                | -                                          | Ref.              | -                                              | Ref.              | -                                            | Ref.              | -                                              | Ref.              |
|              | GA                | 0.11                                       | 0.54 [0.26-1.14]  | 0.12                                           | 0.57 [0.28-1.15]  | 0.05                                         | 0.50 [0.26-0.99]  | 0.41                                           | 0.79 [0.45-1.39]  |
|              | AA                | 0.89                                       | 1.19 [0.11-13.35] | 0.46                                           | 2.10 [0.29-15.23] | 0.60                                         | 1.71 [0.24-12.33] | 0.68                                           | 1.51 [0.21-10.91] |
|              | G                 | -                                          | Ref.              | -                                              | Ref.              | -                                            | Ref.              | -                                              | Ref.              |
|              | A                 | 0.18                                       | 0.64 [0.33-1.24]  | 0.33                                           | 0.74 [0.41-1.35]  | 0.14                                         | 0.65 [0.36-1.16]  | 0.60                                           | 0.87 [0.53-1.44]  |

COVID-19: coronavirus 19 disease. \*The statistical significance was lost after correcting for multiple testing using the Benjamini-Hochberg method for a False Discovery Rate (FDR) of 5%.

**Table S14.** Differences in *IL1B*, *IL18*, *NFKB1*, *ATG16L1*, and *MIF* genotype and allele distribution between COVID-19 patients and healthy controls.

| <i>Locus</i>   | SNP                   | Mild COVID-19<br>patients <i>vs</i><br>Healthy Controls |                  | Moderate COVID-19<br>patients <i>vs</i><br>Healthy Controls |                  | Severe COVID-19<br>patients <i>vs</i><br>Healthy Controls |                  | Critical COVID-19<br>patients <i>vs</i><br>Healthy Controls |                  |
|----------------|-----------------------|---------------------------------------------------------|------------------|-------------------------------------------------------------|------------------|-----------------------------------------------------------|------------------|-------------------------------------------------------------|------------------|
|                |                       | <i>p</i>                                                | OR [95% CI]      | <i>p</i>                                                    | OR [95% CI]      | <i>p</i>                                                  | OR [95% CI]      | <i>p</i>                                                    | OR [95% CI]      |
|                |                       |                                                         |                  |                                                             |                  |                                                           |                  |                                                             |                  |
| <i>IL1B</i>    | <b>rs1143634</b>      |                                                         |                  |                                                             |                  |                                                           |                  |                                                             |                  |
|                | GG                    | -                                                       | Ref.             | -                                                           | Ref.             | -                                                         | Ref.             | -                                                           | Ref.             |
|                | GA                    | 0.85                                                    | 0.94 [0.53-1.70] | 0.91                                                        | 0.97 [0.56-1.68] | 0.96                                                      | 0.99 [0.58-1.67] | 0.75                                                        | 1.08 [0.66-1.76] |
|                | AA                    | 0.37                                                    | 0.55 [0.15-2.04] | 0.14                                                        | 0.31 [0.07-1.44] | 0.49                                                      | 0.68 [0.23-2.00] | 0.19                                                        | 0.46 [0.14-1.47] |
|                | G                     | -                                                       | Ref.             | -                                                           | Ref.             | -                                                         | Ref.             | -                                                           | Ref.             |
|                | A                     | 0.38                                                    | 0.81 [0.50-1.30] | 0.28                                                        | 0.78 [0.50-1.22] | 0.61                                                      | 0.90 [0.59-1.36] | 0.52                                                        | 0.88 [0.60-1.30] |
|                | <b>rs16944</b>        |                                                         |                  |                                                             |                  |                                                           |                  |                                                             |                  |
|                | GG                    | -                                                       | Ref.             | -                                                           | Ref.             | -                                                         | Ref.             | -                                                           | Ref.             |
|                | GA                    | 0.45                                                    | 0.80 [0.45-1.43] | 0.35                                                        | 0.77 [0.43-1.35] | 0.70                                                      | 0.90 [0.54-1.51] | 0.71                                                        | 0.91 [0.55-1.49] |
|                | AA                    | 0.59                                                    | 0.75 [0.27-2.08] | 0.24                                                        | 1.63 [0.73-3.64] | 0.75                                                      | 0.87 [0.36-2.10] | 0.56                                                        | 1.26 [0.58-2.74] |
| <i>IL18</i>    | <b>rs187238</b>       |                                                         |                  |                                                             |                  |                                                           |                  |                                                             |                  |
|                | CC                    | -                                                       | Ref.             | -                                                           | Ref.             | -                                                         | Ref.             | -                                                           | Ref.             |
|                | CG                    | 0.62                                                    | 1.16 [0.65-2.06] | 0.93                                                        | 0.97 [0.56-1.70] | 0.02*                                                     | 0.52 [0.30-0.90] | 0.55                                                        | 0.86 [0.53-1.41] |
|                | GG                    | 0.78                                                    | 0.86 [0.29-2.51] | 0.62                                                        | 1.26 [0.51-3.07] | 0.68                                                      | 0.83 [0.35-1.99] | 0.35                                                        | 0.64 [0.25-1.63] |
|                | C                     | -                                                       | Ref.             | -                                                           | Ref.             | -                                                         | Ref.             | -                                                           | Ref.             |
| <i>NFKB1</i>   | <b>rs28362491</b>     |                                                         |                  |                                                             |                  |                                                           |                  |                                                             |                  |
|                | ATTGATTG/<br>ATTGATTG | -                                                       | Ref.             | -                                                           | Ref.             | -                                                         | Ref.             | -                                                           | Ref.             |
|                | ATTGATTG/<br>ATTG     | 0.72                                                    | 1.12 [0.62-2.01] | 0.92                                                        | 0.97 [0.57-1.67] | 0.59                                                      | 0.87 [0.51-1.46] | 0.03*                                                       | 0.58 [0.36-0.95] |
|                | ATTG/ ATTG            | 0.92                                                    | 1.05 [0.41-2.65] | 0.17                                                        | 0.48 [0.17-1.38] | 0.68                                                      | 1.17 [0.54-2.55] | 0.63                                                        | 0.83 [0.40-1.75] |
|                | ATTGATTG              | -                                                       | Ref.             | -                                                           | Ref.             | -                                                         | Ref.             | -                                                           | Ref.             |
|                | ATTG                  | 0.78                                                    | 1.06 [0.71-1.57] | 0.34                                                        | 0.83 [0.57-1.22] | 0.93                                                      | 1.02 [0.71-1.45] | 0.19                                                        | 0.80 [0.57-1.12] |
| <i>ATG16L1</i> | <b>rs2241880</b>      |                                                         |                  |                                                             |                  |                                                           |                  |                                                             |                  |
|                | GG                    | -                                                       | Ref.             | -                                                           | Ref.             | -                                                         | Ref.             | -                                                           | Ref.             |
|                | GA                    | 0.28                                                    | 1.46 [0.74-2.91] | 0.76                                                        | 1.10 [0.59-2.07] | 0.79                                                      | 1.08 [0.61-1.91] | 0.92                                                        | 0.97 [0.57-1.66] |
|                | AA                    | 0.05                                                    | 2.25 [1.01-5.01] | 0.10                                                        | 1.85 [0.89-3.86] | 0.52                                                      | 1.27 [0.62-2.59] | 0.56                                                        | 1.22 [0.63-2.38] |
|                | G                     | -                                                       | Ref.             | -                                                           | Ref.             | -                                                         | Ref.             | -                                                           | Ref.             |
|                | A                     | 0.04*                                                   | 1.50 [1.01-2.21] | 0.11                                                        | 1.35 [0.93-1.95] | 0.54                                                      | 1.12 [0.79-1.58] | 0.62                                                        | 1.09 [0.78-1.51] |
|                | <b>rs6754677</b>      |                                                         |                  |                                                             |                  |                                                           |                  |                                                             |                  |
|                | AA                    | -                                                       | Ref.             | -                                                           | Ref.             | -                                                         | Ref.             | -                                                           | Ref.             |
|                | AG                    | 0.46                                                    | 1.26 [0.68-2.32] | 0.60                                                        | 1.16 [0.66-2.04] | 0.49                                                      | 0.83 [0.50-1.40] | 0.90                                                        | 0.99 [0.59-1.58] |
|                | GG                    | 0.09                                                    | 2.05 [0.90-4.64] | 0.36                                                        | 1.46 [0.65-3.26] | 0.64                                                      | 0.82 [0.36-1.85] | 0.88                                                        | 0.94 [0.44-2.01] |
| <i>MIF</i>     | <b>rs755622</b>       |                                                         |                  |                                                             |                  |                                                           |                  |                                                             |                  |
|                | GG                    | -                                                       | Ref.             | -                                                           | Ref.             | -                                                         | Ref.             | -                                                           | Ref.             |
|                | GC                    | 0.24                                                    | 1.44 [0.79-2.61] | 0.70                                                        | 0.89 [0.48-1.63] | 0.45                                                      | 1.23 [0.72-2.13] | 0.94                                                        | 0.98 [0.57-1.67] |
|                | CC                    | 0.83                                                    | 0.84 [0.17-4.18] | 0.57                                                        | 0.63 [0.13-3.10] | 0.25                                                      | 0.29 [0.03-2.37] | 0.88                                                        | 0.91 [0.26-3.19] |
|                | G                     | -                                                       | Ref.             | -                                                           | Ref.             | -                                                         | Ref.             | -                                                           | Ref.             |
| <i>MIF</i>     | C                     | 0.53                                                    | 1.18 [0.71-1.95] | 0.51                                                        | 0.84 [0.50-1.41] | 0.94                                                      | 0.98 [0.61-1.57] | 0.88                                                        | 0.97 [0.62-1.51] |

COVID-19: coronavirus 19 disease. \*The statistical significance was lost after correcting for multiple testing using the Benjamini-Hochberg method for a False Discovery Rate (FDR) of 5%.

**Table S15.** Differences in *NLRP3*, *NLRC4*, *NLRP1*, *CARD8*, *CASP1*, *IL1B*, and *ATG16L1* haplotype distribution between COVID-19 mild patients and moderate patients, severe patients as well as critical patients.

| COVID-19 Patients    |        |                         |                  |                       |                  |                         |                  |                           |                  |                             |                  |                           |                  |
|----------------------|--------|-------------------------|------------------|-----------------------|------------------|-------------------------|------------------|---------------------------|------------------|-----------------------------|------------------|---------------------------|------------------|
| Locus                | SNP    | Mild <i>vs</i> moderate |                  | Mild <i>vs</i> Severe |                  | Mild <i>vs</i> Critical |                  | Moderate <i>vs</i> Severe |                  | Moderate <i>vs</i> Critical |                  | Severe <i>vs</i> Critical |                  |
|                      |        | <i>p</i>                | OR [95% CI]      | <i>p</i>              | OR [95% CI]      | <i>p</i>                | OR [95% CI]      | <i>p</i>                  | OR [95% CI]      | <i>p</i>                    | OR [95% CI]      | <i>p</i>                  | OR [95% CI]      |
| NLRP3 <sup>1</sup>   | AACT   | -                       | Ref.             | -                     | Ref.             | -                       | Ref.             | -                         | Ref.             | -                           | Ref.             | -                         | Ref.             |
|                      | GGGT   | 0.15                    | 0.62 [0.30-1.25] | 0.14                  | 0.62 [0.31-1.23] | 0.02*                   | 0.47 [0.24-0.91] | 0.96                      | 1.01 [0.53-1.94] | 0.38                        | 0.77 [0.42-1.43] | 0.43                      | 0.76 [0.43-1.36] |
|                      | GGGG   | <0.01*                  | 0.43 [0.22-0.82] | 0.02*                 | 0.49 [0.26-0.82] | 0.02*                   | 0.48 [0.26-0.91] | 0.64                      | 1.14 [0.64-2.02] | 0.64                        | 1.13 [0.65-1.98] | 0.98                      | 0.99 [0.58-1.71] |
|                      | AACG   | 0.75                    | 1.16 [0.43-3.24] | 0.45                  | 0.73 [0.30-1.74] | 0.11                    | 0.54 [0.23-1.21] | 0.29                      | 0.63 [0.24-1.60] | 0.06                        | 0.47 [0.18-1.11] | 0.38                      | 0.74 [0.35-1.53] |
|                      | GACG   | 0.95                    | 0.97 [0.36-2.67] | 0.88                  | 1.07 [0.40-2.85] | 0.87                    | 1.07 [0.41-2.79] | 0.83                      | 1.10 [0.40-3.00] | 0.82                        | 1.11 [0.41-2.93] | 1.00                      | 1.00 [0.38-2.59] |
|                      | GACT   | 0.29                    | 0.59 [0.19-1.74] | 0.76                  | 0.86 [0.27-2.62] | 0.31                    | 0.62 [0.21-1.71] | 0.43                      | 1.44 [0.52-4.07] | 0.92                        | 1.04 [0.41-2.64] | 0.47                      | 0.72 [0.27-1.88] |
| NLRC4 <sup>2</sup>   | CG     | -                       | Ref.             | -                     | Ref.             | -                       | Ref.             | -                         | Ref.             | -                           | Ref.             | -                         | Ref.             |
|                      | TC     | 0.41                    | 0.82 [0.50-1.35] | 0.50                  | 0.86 [0.53-1.38] | 0.39                    | 1.22 [0.76-1.94] | 0.85                      | 1.04 [0.67-1.63] | 0.06                        | 1.48 [0.95-2.29] | 0.08                      | 1.42 [0.94-2.15] |
| NLRP1 <sup>3</sup>   | TTGCCA | -                       | Ref.             | -                     | Ref.             | -                       | Ref.             | -                         | Ref.             | -                           | Ref.             | -                         | Ref.             |
|                      | TAAGTG | 0.71                    | 0.90 [0.49-1.65] | 0.90                  | 1.04 [0.59-1.83] | 0.54                    | 0.85 [0.49-1.48] | 0.59                      | 1.15 [0.67-1.99] | 0.82                        | 0.94 [0.56-1.61] | 0.40                      | 0.82 [0.50-1.34] |
|                      | CAAGTG | 0.90                    | 1.04 [0.53-2.07] | 1.00                  | 1.00 [0.52-1.95] | 0.67                    | 0.88 [0.46-1.68] | 0.90                      | 0.96 [0.52-1.79] | 0.55                        | 0.84 [0.47-1.54] | 0.63                      | 0.88 [0.50-1.55] |
| CARD8 <sup>4</sup>   | CAA    | -                       | Ref.             | -                     | Ref.             | -                       | Ref.             | -                         | Ref.             | -                           | Ref.             | -                         | Ref.             |
|                      | CGT    | 0.28                    | 0.75 [0.42-1.32] | 0.02*                 | 0.55 [0.32-0.95] | 0.25                    | 0.75 [0.43-1.27] | 0.21                      | 0.74 [0.45-1.22] | 1.00                        | 1.00 [0.61-1.64] | 0.17                      | 1.35 [0.86-2.13] |
|                      | TAA    | 0.59                    | 0.84 [0.43-1.65] | 0.58                  | 0.84 [0.43-1.62] | 0.15                    | 0.66 [0.36-1.21] | 1.00                      | 1.00 [0.54-1.86] | 0.38                        | 0.79 [0.44-1.38] | 0.36                      | 0.79 [0.45-1.36] |
| CASP1 <sup>5</sup>   | CG     | -                       | Ref.             | -                     | Ref.             | -                       | Ref.             | -                         | Ref.             | -                           | Ref.             | -                         | Ref.             |
|                      | TA     | 0.87                    | 0.94 [0.39-2.20] | 0.99                  | 1.01 [0.42-2.33] | 0.46                    | 0.76 [0.34-1.63] | 0.84                      | 1.07 [0.49-2.36] | 0.54                        | 0.82 [0.39-1.64] | 0.40                      | 0.76 [0.37-1.50] |
|                      | TG     | 0.08                    | 1.98 [0.87-4.65] | 0.62                  | 1.18 [0.58-2.38] | 0.19                    | 1.55 [0.75-3.17] | 0.16                      | 0.60 [0.26-1.30] | 0.52                        | 0.79 [0.34-1.74] | 0.39                      | 1.32 [0.67-2.61] |
| IL1B <sup>6</sup>    | GG     | -                       | Ref.             | -                     | Ref.             | -                       | Ref.             | -                         | Ref.             | -                           | Ref.             | -                         | Ref.             |
|                      | AG     | 0.46                    | 0.82 [0.48-1.42] | 0.96                  | 1.01 [0.59-1.72] | 0.71                    | 0.91 [0.55-1.52] | 0.39                      | 1.23 [0.75-2.03] | 0.65                        | 1.11 [0.69-1.79] | 0.65                      | 0.90 [0.57-1.43] |
|                      | GA     | 0.76                    | 1.10 [0.58-2.09] | 0.85                  | 1.06 [0.58-1.93] | 0.74                    | 1.10 [0.61-1.97] | 0.90                      | 0.96 [0.53-1.75] | 1.00                        | 1.00 [0.56-1.79] | 0.88                      | 1.04 [0.60-1.78] |
| ATG16L1 <sup>7</sup> | GA     | -                       | Ref.             | -                     | Ref.             | -                       | Ref.             | -                         | Ref.             | -                           | Ref.             | -                         | Ref.             |
|                      | AG     | 0.54                    | 1.16 [0.69-1.95] | 0.07                  | 1.55 [0.94-2.57] | 0.12                    | 1.43 [0.89-2.30] | 0.22                      | 1.33 [0.82-2.18] | 0.35                        | 1.23 [0.78-1.95] | 0.71                      | 0.92 [0.59-1.44] |
|                      | AA     | 0.77                    | 0.90 [0.42-1.91] | 0.65                  | 0.86 [0.42-1.73] | 0.44                    | 1.30 [0.62-2.63] | 0.88                      | 0.95 [0.50-1.82] | 0.25                        | 1.44 [0.74-2.77] | 0.16                      | 1.50 [0.82-2.77] |

COVID-19: coronavirus 19 disease. The order of the polymorphisms was: <sup>1</sup>rs4925659, rs10159239, rs10754558 and rs4353135 for *NLRP3*; <sup>2</sup>rs385076 and rs479333 for *NLRC4*; <sup>3</sup>rs4790797, rs8182352, rs878329, rs2670660, rs12150220, rs6502867 for *NLRP1*; <sup>4</sup>rs11672725, rs6509365 and rs2043211 for *CARD8*; <sup>5</sup>rs501192 and rs488992 for *CASP1*; <sup>6</sup>rs1143634 and rs16944 for *IL1B*; <sup>7</sup>rs2241880 and rs6754677 for *ATG16L1*. Haplotypes with a frequency higher than 5% are displayed in the table. \*The statistical significance was lost after correcting for multiple testing using the Benjamini-Hochberg method for a False Discovery Rate (FDR) of 5%.

**Table S16.** Differences in *NLRP3*, *NLRC4*, *NLRP1*, *CARD8*, *CASP1*, *IL1B*, and *ATG16L1* haplotype distribution between COVID-19 patients and healthy controls.

| <i>Locus</i>                | <i>Haplotypes</i> | Mild COVID-19 patients vs Healthy Controls |                  | Moderate COVID-19 patients vs Healthy Controls |                  | Severe COVID-19 patients vs Healthy Controls |                  | Critical COVID-19 patients vs Healthy Controls |                  |
|-----------------------------|-------------------|--------------------------------------------|------------------|------------------------------------------------|------------------|----------------------------------------------|------------------|------------------------------------------------|------------------|
|                             |                   | <i>p</i>                                   | OR [95% CI]      | <i>p</i>                                       | OR [95% CI]      | <i>p</i>                                     | OR [95% CI]      | <i>p</i>                                       | OR [95% CI]      |
| <i>NLRP3</i> <sup>1</sup>   | <b>AACT</b>       | -                                          | Ref.             | -                                              | Ref.             | -                                            | Ref.             | -                                              | Ref.             |
|                             | <b>GGGT</b>       | <0.01*                                     | 0.42 [0.23-0.77] | 0.16                                           | 0.69 [0.39-1.20] | 0.13                                         | 0.68 [0.40-1.15] | 0.62                                           | 0.89 [0.55-1.45] |
|                             | <b>GGGG</b>       | 0.04*                                      | 0.56 [0.31-1.02] | 0.27                                           | 1.32 [0.78-2.21] | 0.55                                         | 1.16 [0.70-1.91] | 0.52                                           | 1.16 [0.71-1.89] |
|                             | <b>AACG</b>       | 0.08                                       | 0.54 [0.24-1.13] | 0.05                                           | 0.47 [0.19-1.04] | 0.33                                         | 0.73 [0.37-1.43] | 0.99                                           | 1.00 [0.54-1.83] |
|                             | <b>GACG</b>       | 0.28                                       | 0.67 [0.29-1.47] | 0.34                                           | 0.69 [0.29-1.55] | 0.21                                         | 0.62 [0.27-1.36] | 0.19                                           | 0.62 [0.28-1.33] |
|                             | <b>GACT</b>       | 0.12                                       | 0.51 [0.19-1.25] | 0.69                                           | 0.86 [0.36-1.92] | 0.19                                         | 0.59 [0.24-1.37] | 0.58                                           | 0.82 [0.38-1.74] |
| <i>NLRC4</i> <sup>2</sup>   | <b>CG</b>         | -                                          | Ref.             | -                                              | Ref.             | -                                            | Ref.             | -                                              | Ref.             |
|                             | <b>TC</b>         | 0.50                                       | 0.86 [0.55-1.36] | 0.81                                           | 1.05 [0.69-1.61] | 0.96                                         | 1.01 [0.67-1.51] | 0.08                                           | 0.71 [0.48-1.06] |
| <i>NLRP1</i> <sup>3</sup>   | <b>TTGCCA</b>     | -                                          | Ref.             | -                                              | Ref.             | -                                            | Ref.             | -                                              | Ref.             |
|                             | <b>TAAGTG</b>     | 0.95                                       | 1.02 [0.61-1.68] | 0.70                                           | 0.91 [0.56-1.47] | 0.81                                         | 1.05 [0.68-1.63] | 0.47                                           | 0.86 [0.57-1.31] |
|                             | <b>CAAGTG</b>     | 0.52                                       | 1.20 [0.63-2.16] | 0.40                                           | 1.25 [0.72-2.15] | 0.46                                         | 1.20 [0.71-2.01] | 0.83                                           | 1.05 [0.64-1.72] |
| <i>CARD8</i> <sup>4</sup>   | <b>CAA</b>        | -                                          | Ref.             | -                                              | Ref.             | -                                            | Ref.             | -                                              | Ref.             |
|                             | <b>CGT</b>        | 0.05                                       | 0.63 [0.38-1.03] | 0.44                                           | 0.85 [0.54-1.32] | 0.50                                         | 1.14 [0.76-1.70] | 0.39                                           | 0.85 [0.57-1.26] |
|                             | <b>TAA</b>        | 0.56                                       | 0.85 [0.47-1.51] | 0.96                                           | 1.01 [0.58-1.73] | 0.97                                         | 1.01 [0.60-1.69] | 0.26                                           | 1.29 [0.81-2.03] |
| <i>CASP1</i> <sup>5</sup>   | <b>CG</b>         | -                                          | Ref.             | -                                              | Ref.             | -                                            | Ref.             | -                                              | Ref.             |
|                             | <b>TA</b>         | 0.28                                       | 0.69 [0.32-1.38] | 0.32                                           | 0.74 [0.38-1.38] | 0.21                                         | 0.69 [0.36-1.27] | 0.71                                           | 0.91 [0.53-1.54] |
|                             | <b>TG</b>         | 0.01*                                      | 2.29 [1.13-4.57] | 0.69                                           | 1.16 [0.51-2.51] | 0.03*                                        | 1.94 [1.01-3.74] | 0.22                                           | 1.47 [0.75-2.86] |
| <i>IL1B</i> <sup>6</sup>    | <b>GG</b>         | -                                          | Ref.             | -                                              | Ref.             | -                                            | Ref.             | -                                              | Ref.             |
|                             | <b>AG</b>         | 0.96                                       | 0.99 [0.61-1.59] | 0.39                                           | 1.20 [0.77-1.86] | 0.90                                         | 0.97 [0.63-1.49] | 0.69                                           | 1.08 [0.73-1.60] |
|                             | <b>GA</b>         | 0.90                                       | 1.03 [0.60-1.76] | 0.81                                           | 0.94 [0.55-1.60] | 0.92                                         | 0.98 [0.60-1.59] | 0.79                                           | 0.94 [0.59-1.50] |
| <i>ATG16L1</i> <sup>7</sup> | <b>GA</b>         | -                                          | Ref.             | -                                              | Ref.             | -                                            | Ref.             | -                                              | Ref.             |
|                             | <b>AG</b>         | 0.06                                       | 1.50 [0.96-2.33] | 0.22                                           | 1.29 [0.84-1.97] | 0.86                                         | 0.97 [0.64-1.45] | 0.81                                           | 1.05 [0.72-1.52] |
|                             | <b>AA</b>         | 0.57                                       | 1.19 [0.61-2.27] | 0.33                                           | 1.32 [0.72-2.39] | 0.21                                         | 1.39 [0.80-2.37] | 0.75                                           | 0.92 [0.53-1.59] |

COVID-19: coronavirus 19 disease. The order of the polymorphisms was: <sup>1</sup>rs4925659, rs10159239, rs10754558 and rs4353135 for *NLRP3*; <sup>2</sup>rs385076 and rs479333 for *NLRC4*; <sup>3</sup>rs4790797, rs8182352, rs878329, rs2670660, rs12150220, rs6502867 for *NLRP1*; <sup>4</sup>rs11672725, rs6509365 and rs2043211 for *CARD8*; <sup>5</sup>rs501192 and rs488992 for *CASP1*; <sup>6</sup>rs1143634 and rs16944 for *IL1B*; <sup>7</sup>rs2241880 and rs6754677 for *ATG16L1*. Haplotypes with a frequency higher than 5% are displayed in the table. \*The statistical significance was lost after correcting for multiple testing using the Benjamini-Hochberg method for a False Discovery Rate (FDR) of 5%.
